# Supplementary material
Source: Research Square preprint supplement (doi:10.21203/rs.3.rs-8977511/v1)
Supplement: Supplementary file 1 [file 40a6f0e8f31a705ad2289f9b.pdf]

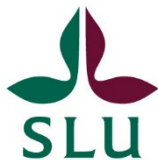

Initial search, on the 22th of March 2022

| <b>Database:</b> Biosis<br><b>Date:</b> 2023-03-22 |                                                                                                                                                                       |         |
|----------------------------------------------------|-----------------------------------------------------------------------------------------------------------------------------------------------------------------------|---------|
| Search                                             | Terms                                                                                                                                                                 | Result  |
| 1                                                  | TS=(cat OR cats OR feline OR Dog OR dogs OR canine OR canis OR felis)                                                                                                 | 149,040 |
| 2                                                  | TS=((pyelonephrit* OR nephrit* OR pyelitis OR pyonephros*) OR (("Acute kidney injur*" OR "Acute kidney failure" OR "Acute Renal failure") AND (Infect* OR Bacteri*))) | 19,277  |
| 3                                                  | 1 AND 2                                                                                                                                                               | 288     |

**Search query:**

TS=(cat OR cats OR feline OR Dog OR dogs OR canine OR canis OR felis) AND  
TS=((pyelonephrit\* OR nephrit\* OR pyelitis OR pyonephros\*) OR (("Acute kidney injur\*" OR "Acute kidney failure" OR "Acute Renal failure") AND (Infect\* OR Bacteri\*)))

| <b>Database:</b> CABI, Cab Abstracts<br><b>Date:</b> 2023-03-22 |                                                                                                                                                                       |         |
|-----------------------------------------------------------------|-----------------------------------------------------------------------------------------------------------------------------------------------------------------------|---------|
| Search                                                          | Terms                                                                                                                                                                 | Result  |
| 1                                                               | TS=(cat OR cats OR feline OR Dog OR dogs OR canine OR canis OR felis)                                                                                                 | 384,474 |
| 2                                                               | TS=((pyelonephrit* OR nephrit* OR pyelitis OR pyonephros*) OR (("Acute kidney injur*" OR "Acute kidney failure" OR "Acute Renal failure") AND (Infect* OR Bacteri*))) | 14,182  |
| 3                                                               | 1 AND 2                                                                                                                                                               | 1418    |

**Search query:**

TS=(cat OR cats OR feline OR Dog OR dogs OR canine OR canis OR felis) AND  
TS=((pyelonephrit\* OR nephrit\* OR pyelitis OR pyonephros\*) OR (("Acute kidney injur\*" OR "Acute kidney failure" OR "Acute Renal failure") AND (Infect\* OR Bacteri\*)))

| Database: Medline via WoS |                                                                                                                                                                     |              |
|---------------------------|---------------------------------------------------------------------------------------------------------------------------------------------------------------------|--------------|
| Date: 2023-03-22          |                                                                                                                                                                     |              |
| Search                    | Terms                                                                                                                                                               | Result       |
| 1                         | TS=(cat OR cats OR feline OR Dog OR dogs OR canine OR canis OR felis)                                                                                               | 582,583      |
| 2                         | TS=((pyelonephrit* OR nephrit* OR pyelitis OR pyonephros*) OR (“Acute kidney injur*” OR “Acute kidney failure” OR “Acute Renal failure”) AND (Infect* OR Bacteri*)) | 71,010       |
| 3                         | MHX=(Pyelonephritis OR Nephritis, Interstitial OR Pyelitis OR Pyonephrosis OR Acute Kidney Injury)                                                                  | 75,800       |
| 4                         | 2 OR 3                                                                                                                                                              | 118,713      |
| 5                         | 1 AND 4                                                                                                                                                             | <b>2,122</b> |

**Search query:**

TS=(cat OR cats OR feline OR Dog OR dogs OR canine OR canis OR felis) AND (TS=((pyelonephrit\* OR nephrit\* OR pyelitis OR pyonephros\*) OR (“Acute kidney injur\*” OR “Acute kidney failure” OR “Acute Renal failure”) AND (Infect\* OR Bacteri\*)) OR (MHX=(Pyelonephritis OR Nephritis, Interstitial OR Pyelitis OR Pyonephrosis OR Acute Kidney Injury)))

| Database: Web of Science, Core collection (SCI-EXPANDED, SSCI, AHCI, ESCI) |                                                                                                                                                                     |            |
|----------------------------------------------------------------------------|---------------------------------------------------------------------------------------------------------------------------------------------------------------------|------------|
| Date: 2023-03-22                                                           |                                                                                                                                                                     |            |
| Search                                                                     | Terms                                                                                                                                                               | Result     |
| 1                                                                          | TS=(cat OR cats OR feline OR Dog OR dogs OR canine OR canis OR felis)                                                                                               | 590,613    |
| 2                                                                          | TS=((pyelonephrit* OR nephrit* OR pyelitis OR pyonephros*) OR (“Acute kidney injur*” OR “Acute kidney failure” OR “Acute Renal failure”) AND (Infect* OR Bacteri*)) | 57,647     |
| 3                                                                          | 1 AND 2                                                                                                                                                             | <b>873</b> |

**Search query:**

TS=(cat OR cats OR feline OR Dog OR dogs OR canine OR canis OR felis) AND TS=((pyelonephrit\* OR nephrit\* OR pyelitis OR pyonephros\*) OR (“Acute kidney injur\*” OR “Acute kidney failure” OR “Acute Renal failure”) AND (Infect\* OR Bacteri\*))

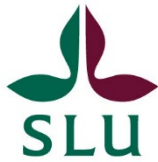

| <b>Database:</b> Scopus<br><b>Date:</b> 2023-03-22 |                                                                                                                                                                                                               |               |
|----------------------------------------------------|---------------------------------------------------------------------------------------------------------------------------------------------------------------------------------------------------------------|---------------|
| <b>Search</b>                                      | <b>Terms</b>                                                                                                                                                                                                  | <b>Result</b> |
| 1                                                  | TITLE-ABS-KEY(cat OR cats OR feline OR Dog OR dogs OR canine OR canis OR felis)                                                                                                                               | 768,382       |
| 2                                                  | (TITLE-ABS-KEY(pyelonephrit* OR nephrit* OR pyelitis OR pyonephros*)) OR ((TITLE-ABS-KEY("Acute kidney injur*" OR "Acute kidney failure" OR "Acute Renal failure")) AND (TITLE-ABS-KEY(Infect* OR Bacteri*))) | 117,641       |
| 3                                                  | 1 AND 2                                                                                                                                                                                                       | <b>1,742</b>  |

**Search query:**

(TITLE-ABS-KEY(cat OR cats OR feline OR Dog OR dogs OR canine OR canis OR felis))  
AND ((TITLE-ABS-KEY(pyelonephrit\* OR nephrit\* OR pyelitis OR pyonephros\*)) OR  
((TITLE-ABS-KEY("Acute kidney injur\*" OR "Acute kidney failure" OR "Acute Renal failure"))  
AND (TITLE-ABS-KEY(Infect\* OR Bacteri\*))))
