# Supplementary material
Source: Research Square preprint supplement (doi:10.21203/rs.3.rs-8977511/v1)
Supplement: Supplementary file 2 [file 764183a0159569e326803919.pdf]

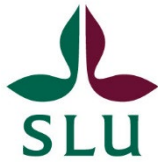

Second search on the 9th of January 2025.

| <b>Database:</b> Biosis |                                                                                                                                                                       |               |
|-------------------------|-----------------------------------------------------------------------------------------------------------------------------------------------------------------------|---------------|
| <b>Date:</b> 2025-01-09 |                                                                                                                                                                       |               |
| <b>Search</b>           | <b>Terms</b>                                                                                                                                                          | <b>Result</b> |
| 1                       | TS=(cat OR cats OR feline OR Dog OR dogs OR canine OR canis OR felis)                                                                                                 | 170,093       |
| 2                       | TS=((pyelonephrit* OR nephrit* OR pyelitis OR pyonephros*) OR (("Acute kidney injur*" OR "Acute kidney failure" OR "Acute Renal failure") AND (Infect* OR Bacteri*))) | 23,184        |
| 3                       | 1 AND 2                                                                                                                                                               | 339           |
| 4                       | Year: 2020-                                                                                                                                                           | 126           |

| <b>Database:</b> CABI, Cab Abstracts |                                                                                                                                                                       |               |
|--------------------------------------|-----------------------------------------------------------------------------------------------------------------------------------------------------------------------|---------------|
| <b>Date:</b> 2025-02-04              |                                                                                                                                                                       |               |
| <b>Search</b>                        | <b>Terms</b>                                                                                                                                                          | <b>Result</b> |
| 1                                    | TS=(cat OR cats OR feline OR Dog OR dogs OR canine OR canis OR felis)                                                                                                 | 405,775       |
| 2                                    | TS=((pyelonephrit* OR nephrit* OR pyelitis OR pyonephros*) OR (("Acute kidney injur*" OR "Acute kidney failure" OR "Acute Renal failure") AND (Infect* OR Bacteri*))) | 8,728         |
| 3                                    | 1 AND 2                                                                                                                                                               | 1,448         |
| 4                                    | Year: 2020-                                                                                                                                                           | 216           |

| <b>Database:</b> Medline via WoS |                                                                                                                                                                       |               |
|----------------------------------|-----------------------------------------------------------------------------------------------------------------------------------------------------------------------|---------------|
| <b>Date:</b> 2025-02-04          |                                                                                                                                                                       |               |
| <b>Search</b>                    | <b>Terms</b>                                                                                                                                                          | <b>Result</b> |
| 1                                | TS=(cat OR cats OR feline OR Dog OR dogs OR canine OR canis OR felis)                                                                                                 | 608,510       |
| 2                                | TS=((pyelonephrit* OR nephrit* OR pyelitis OR pyonephros*) OR (("Acute kidney injur*" OR "Acute kidney failure" OR "Acute Renal failure") AND (Infect* OR Bacteri*))) | 76,100        |
| 3                                | MHX=(Pyelonephritis OR Nephritis, Interstitial OR Pyelitis OR Pyonephrosis OR Acute Kidney Injury)                                                                    | 81,089        |



|   |             |         |
|---|-------------|---------|
| 4 | 2 OR 3      | 128,091 |
| 5 | 1 AND 4     | 2,234   |
| 6 | Year: 2020- | 314     |

| <b>Database:</b> Web of Science, Core collection (SCI-EXPANDED, SSCI, AHCI, ESCI) |                                                                                                                                                                       |         |
|-----------------------------------------------------------------------------------|-----------------------------------------------------------------------------------------------------------------------------------------------------------------------|---------|
| <b>Date:</b> 2025-02-04                                                           |                                                                                                                                                                       |         |
| Search                                                                            | Terms                                                                                                                                                                 | Result  |
| 1                                                                                 | TS=(cat OR cats OR feline OR Dog OR dogs OR canine OR canis OR felis)                                                                                                 | 698,287 |
| 2                                                                                 | TS=((pyelonephrit* OR nephrit* OR pyelitis OR pyonephros*) OR (("Acute kidney injur*" OR "Acute kidney failure" OR "Acute Renal failure") AND (Infect* OR Bacteri*))) | 68,770  |
| 3                                                                                 | 1 AND 2                                                                                                                                                               | 1,157   |
| 4                                                                                 | Year: 2020-                                                                                                                                                           | 205     |

| <b>Database:</b> Scopus |                                                                                                                                                                                                               |         |
|-------------------------|---------------------------------------------------------------------------------------------------------------------------------------------------------------------------------------------------------------|---------|
| <b>Date:</b> 2025-02-04 |                                                                                                                                                                                                               |         |
| Search                  | Terms                                                                                                                                                                                                         | Result  |
| 1                       | TITLE-ABS-KEY(cat OR cats OR feline OR Dog OR dogs OR canine OR canis OR felis)                                                                                                                               | 817,731 |
| 2                       | (TITLE-ABS-KEY(pyelonephrit* OR nephrit* OR pyelitis OR pyonephros*)) OR ((TITLE-ABS-KEY("Acute kidney injur*" OR "Acute kidney failure" OR "Acute Renal failure")) AND (TITLE-ABS-KEY(Infect* OR Bacteri*))) | 130,456 |
| 3                       | 1 AND 2                                                                                                                                                                                                       | 1,939   |
| 4                       | Year: 2020-                                                                                                                                                                                                   | 485     |
